# Supplementary material
Source: PubMed Central journal article supplement (PMC8412374)
Supplement: NIHMS1727758-supplement-1.pdf [file NIHMS1727758-supplement-1.pdf]

## Supporting Information

## Photothermal therapy combined with neoantigen cancer vaccination for effective immunotherapy against large established tumors and distant metastasis.

*Jutaek Nam, Sejin Son, Kyung Soo Park, and James J. Moon\**

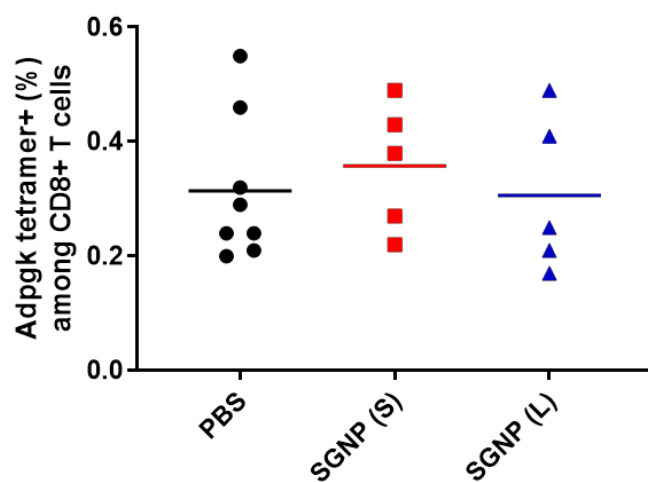

**Figure S1.** Frequency of Adpgk-specific CD8+ T cells in PBMCs by PBS or SGNP, followed by laser irradiation, in mice bearing small (S) or large (L) tumors.

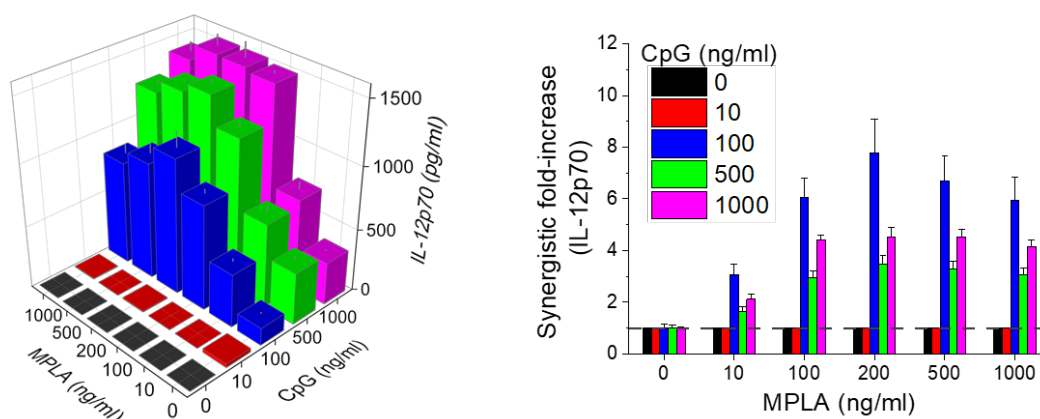

**Figure S2.** Secretion of IL-12p70 by BMDCs and corresponding synergistic fold increase, compared with the additive level, as measured after the combinational treatment of MPLA (0 – 1000 ng/ml) and CpG (0 – 1000 ng/ml) for 24 h.

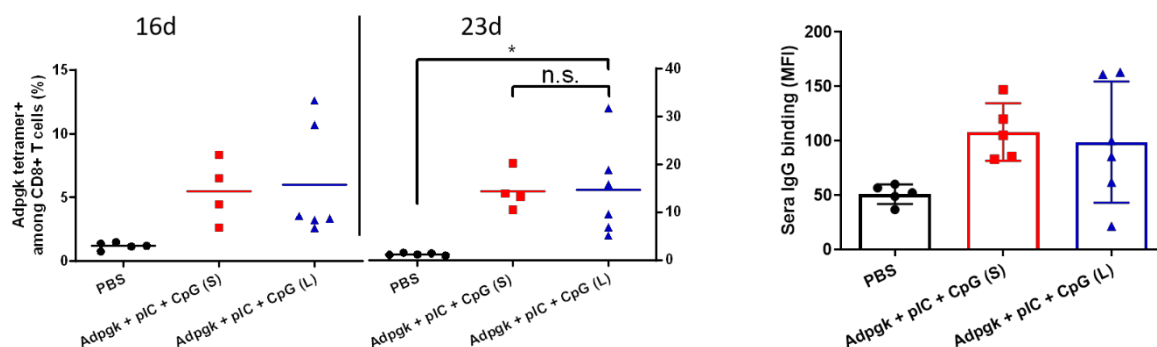

**Figure S3.** Frequency of Adpgk-specific CD8+ T cells in PBMCs and MFI of MC38 cell-binding sera IgG in mice bearing small (S) or large (L) tumors.

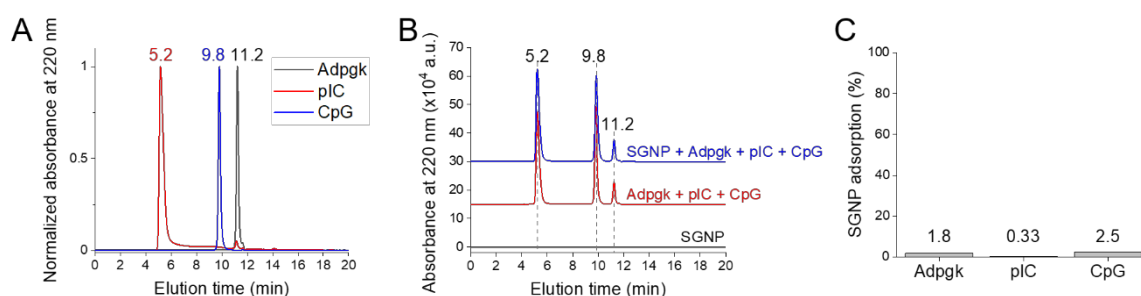

**Figure S4.** (A) Normalized gel permeation chromatography (GPC) spectra of Adpgk, pIC, and CpG. (B) SGNPs were mixed with Adpgk/pIC/CpG for 24 h at room temperature, separated by centrifuge, and the supernatant was compared with the original solution of Adpgk/pIC/CpG and supernatant of pristine SGNP suspension on GPC. (C) SGNP adsorption of Adpgk, pIC, or CpG calculated by their GPC intensity changes in the supernatant solutions shown in (B).

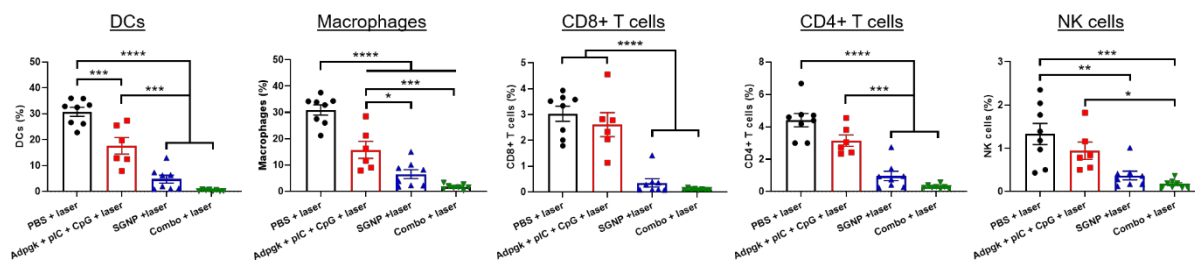

**Figure S5.** The frequency of DCs, macrophages, CD8+ T cells, CD4+ T cells, and NK cells in the primary tumors.

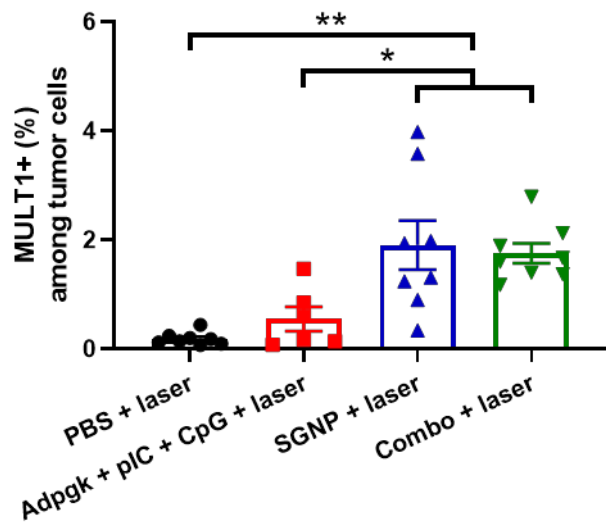

**Figure S6.** Percent of MULT-1-positive cells in the primary tumors.

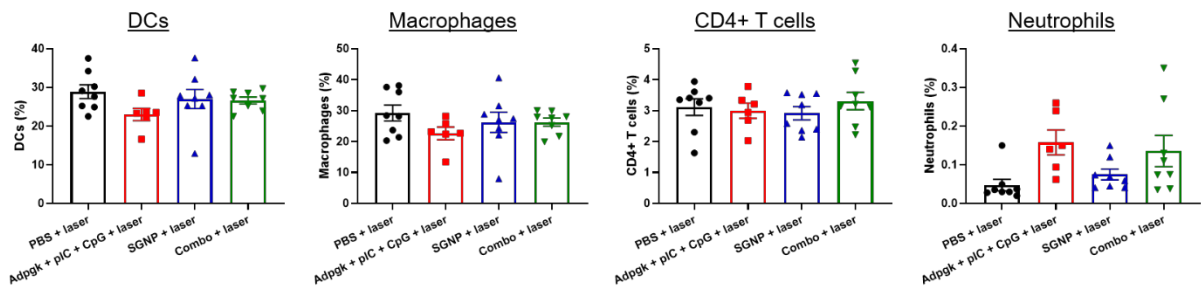

**Figure S7.** The frequency of DCs, macrophages, CD4+ T cells, and neutrophils in the contralateral tumors.
